# Supplementary material for: Investigation of the halophilic PET hydrolase PET6 from Vibrio gazogenes
Source: PubMed Central journal article supplement (PMC9679969; doi:10.1002/pro.4500), 2022-12
Supplement: PRO-31-e4500-s001.pdf [file PRO-31-e4500-s001.pdf]

# Supporting Information

for

## Investigation of the halophilic PET hydrolase PET6 from *Vibrio gazogenes*

Weigert, Sebastian<sup>1</sup>; Perez-Garcia, Pablo<sup>2,3</sup>; Gisdon, Florian<sup>1</sup>; Gagsteiger, Andreas<sup>1</sup>; Schweinshaut, Kristine<sup>1</sup>; Ullmann, Matthias<sup>4</sup>; Chow, Jennifer<sup>2</sup>; Streit, Wolfgang<sup>2</sup>; Höcker, Birte<sup>1,\*</sup>

The file includes:

**Table S1:** BLASTp searches against NCBI taxid662 *Vibrio*

**Table S2:** Quality indicators for crystallographic data and model building for the crystal structure of PET6

**Figure S1:** Molecular relations between the putative *Vibrio* PETases and all PETases in the PAZy database

**Figure S3:** Comparison of electron densities at the three proposed ion-binding sites in PET6

**Figure S2:** Probability density distributions of distances related to the mutated residues Thr91 and Ala92 in PET6-VSTA

**Table S1:** BLASTp search against NCBI taxid662 *Vibrio*

| Description                                            | Common Name            | Max Score | Total Score | Query Cover | E value   | Per. ident | Acc. Len | Accession      |
|--------------------------------------------------------|------------------------|-----------|-------------|-------------|-----------|------------|----------|----------------|
| hypothetical protein [Vibrio gazogenes]                | Vibrio gazogenes       | 614       | 614         | 100%        | 0         | 100,00%    | 297      | WP_077316261.1 |
| hypothetical protein BSQ33_03270 [Vibrio gazogenes]    | Vibrio gazogenes       | 586       | 586         | 100%        | 0         | 94,95%     | 298      | ASA57064.1     |
| lipase [Vibrio gazogenes]                              | Vibrio gazogenes       | 585       | 585         | 100%        | 0         | 94,95%     | 297      | WP_021018894.1 |
| hypothetical protein [Vibrio spartinae]                | Vibrio spartinae       | 584       | 584         | 99%         | 0         | 94,59%     | 297      | WP_083602694.1 |
| Lipase 1 [Vibrio ruber DSM 16370]                      | Vibrio ruber DSM 16370 | 558       | 558         | 99%         | 0         | 89,53%     | 317      | SINS9255.1     |
| alpha/beta hydrolase [Vibrio ruber]                    | Vibrio ruber           | 557       | 557         | 99%         | 0         | 89,53%     | 297      | WP_139344129.1 |
| alpha/beta hydrolase [Vibrio zhugei]                   | Vibrio zhugei          | 513       | 513         | 100%        | 0         | 80,81%     | 297      | WP_123015358.1 |
| hypothetical protein [Vibrio palustris]                | Vibrio palustris       | 501       | 501         | 100%        | 5,00E-179 | 79,93%     | 299      | WP_077315388.1 |
| RICIN domain-containing protein [Vibrio gazogenes]     | Vibrio gazogenes       | 73,9      | 73,9        | 78%         | 2,00E-12  | 26,05%     | 469      | WP_021021550.1 |
| RICIN domain-containing protein [Vibrio spartinae]     | Vibrio spartinae       | 73,6      | 73,6        | 78%         | 2,00E-12  | 25,48%     | 469      | WP_074375079.1 |
| RICIN domain-containing protein [Vibrio spartinae]     | Vibrio spartinae       | 72        | 72          | 78%         | 7,00E-12  | 24,71%     | 469      | WP_182288351.1 |
| RICIN domain-containing protein [Vibrio zhugei]        | Vibrio zhugei          | 71,2      | 71,2        | 78%         | 9,00E-12  | 24,32%     | 394      | WP_123015726.1 |
| RICIN domain-containing protein [Vibrio rhizosphaerae] | Vibrio rhizosphaerae   | 70,1      | 70,1        | 78%         | 3,00E-11  | 24,71%     | 469      | WP_051680565.1 |
| RICIN domain-containing protein [Vibrio ruber]         | Vibrio ruber           | 69,7      | 69,7        | 78%         | 4,00E-11  | 24,71%     | 469      | WP_077337226.1 |
| RICIN domain-containing protein [Vibrio gazogenes]     | Vibrio gazogenes       | 69,7      | 69,7        | 78%         | 4,00E-11  | 24,71%     | 469      | WP_072955206.1 |

**Table S2:** Quality indicators for crystallographic data and model building for the crystal structure of PET6. Statistics for the highest resolution shell are shown in parentheses.

|                                   |                         |
|-----------------------------------|-------------------------|
| Structure (PDB ID)                | PET6<br>7Z6B            |
| Wavelength (Å)                    | 0.9184                  |
| Resolution range (Å)              | 25.7 - 1.4 (1.45 - 1.4) |
| Space group                       | P 1                     |
| Unit cell                         |                         |
| a, b, c (Å)                       | 44.82, 72.61, 72.76,    |
| $\alpha$ , $\beta$ , $\gamma$ (°) | 119.78, 91.64, 91.82    |
| Total reflections                 | 566942 (37590)          |
| Unique reflections                | 150015 (14386)          |
| Multiplicity                      | 3.8 (2.6)               |
| Completeness (%)                  | 95.77 (91.87)           |
| Mean I/sigma(I)                   | 19.45 (4.70)            |
| Wilson B-factor                   | 9.53                    |
| R-merge                           | 0.04679 (0.2477)        |
| R-meas                            | 0.05424 (0.3)           |
| R-pim                             | 0.0271 (0.1654)         |
| CC <sub>1/2</sub>                 | 0.999 (0.928)           |
| CC*                               | 1 (0.981)               |
| Reflections used in refinement    | 149922 (14378)          |
| Reflections used for R-free       | 7493 (718)              |
| R <sub>work</sub>                 | 0.0996 (0.1431)         |
| R <sub>free</sub>                 | 0.1264 (0.1727)         |
| CC <sub>work</sub>                | 0.982 (0.956)           |
| CC <sub>free</sub>                | 0.975 (0.931)           |
| Number of non-hydrogen atoms      | 8045                    |
| macromolecules                    | 6815                    |
| ligands                           | 648                     |
| solvent                           | 960                     |
| Protein residues                  | 831                     |
| RMS(bonds)                        | 0.014                   |
| RMS(angles)                       | 1.52                    |
| Ramachandran favored (%)          | 98.18                   |
| Ramachandran allowed (%)          | 1.82                    |
| Ramachandran outliers (%)         | 0.00                    |
| Rotamer outliers (%)              | 0.66                    |
| Clashscore                        | 6.67                    |
| Average B-factor                  | 15.68                   |
| macromolecules                    | 13.05                   |
| ligands                           | 36.27                   |
| solvent                           | 28.56                   |

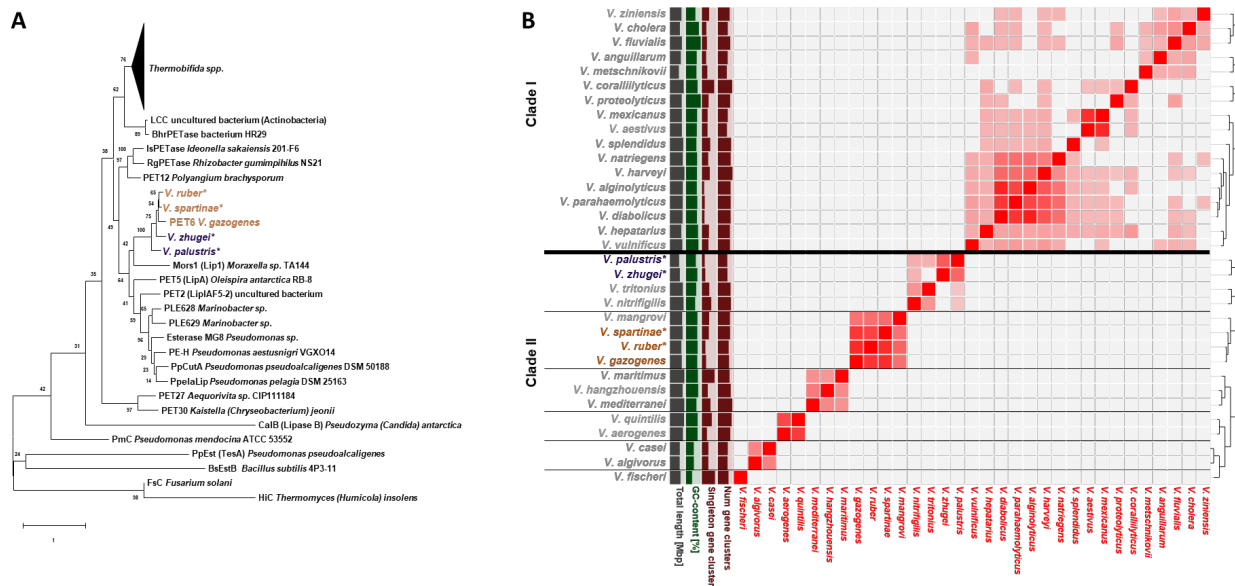

**Figure S1:** Molecular relations between the putative *Vibrio* PETases and all PETases in the PAZy database (A). Pangenome analysis of 33 *Vibrio* genomes (B). The genomes of 28 pathogenic and non-pathogenic *Vibrios* (grey) that do not code for a PET6 homolog were compared against the ones in the pangenomic analysis in Figure 1. The analysis includes 27,156 gene clusters (GCs) involving 135,122 individual gene calls. Total length (range: 0-6 Mbp), GC content (30-50 %), number of singleton GCs (0-1,000) and number of gene clusters (0-5,000). Genomes are arranged according to ANI of the aligned fraction (red), which reveals two major clades (left). *V. fischeri* was renamed to *Aliivibrio fischeri*.<sup>1</sup>

Reference:

(1) Urbanczyk, H.; Ast, J. C.; Higgins, M. J.; Carson, J.; Dunlap, P. V. Reclassification of *Vibrio Fischeri*, *Vibrio Logei*, *Vibrio Salmonicida* and *Vibrio Wodanis* as *Aliivibrio Fischeri* Gen. Nov., Comb. Nov., *Aliivibrio Logei* Comb. Nov., *Aliivibrio Salmonicida* Comb. Nov. and *Aliivibrio Wodanis* Comb. Nov. *International Journal of Systematic and Evolutionary Microbiology* **2007**, 57 (12), 2823–2829. <https://doi.org/10.1099/ijs.0.65081-0>.

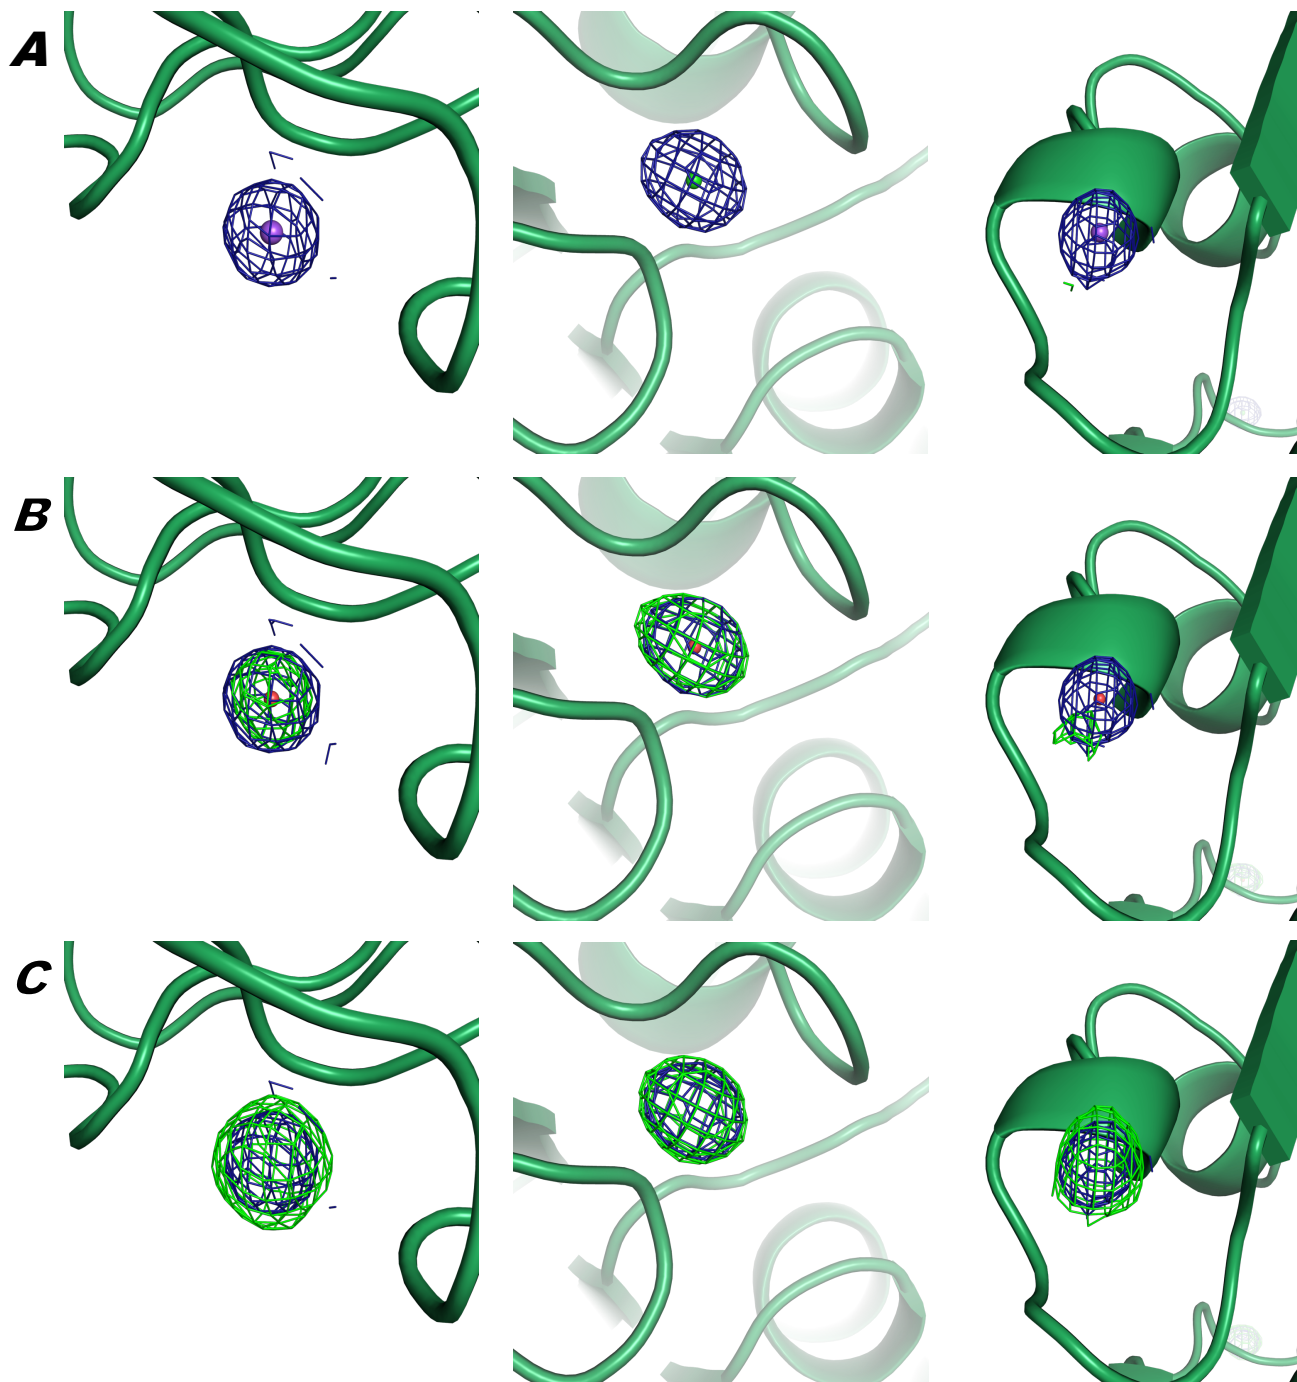

**Figure S2:** Comparison of electron densities at the three proposed ion-binding sites in PET6 (see same arrangement from left to right in Figure 3 D). The ions in the otherwise finalized structure were either substituted or deleted and the electron density was then recalculated: **A** for the coordinated sodium (violet) and chloride (neon green) ions, **B** when replaced by a water (red) at the coordination site, and **C** when no coordinated atoms are modelled. Densities are shown around 1.6 Å of the respective ion and are contoured at  $\sigma = 1.0$  for regular density (blue) and  $\sigma = 3.0$  for differential density (neon green), respectively.

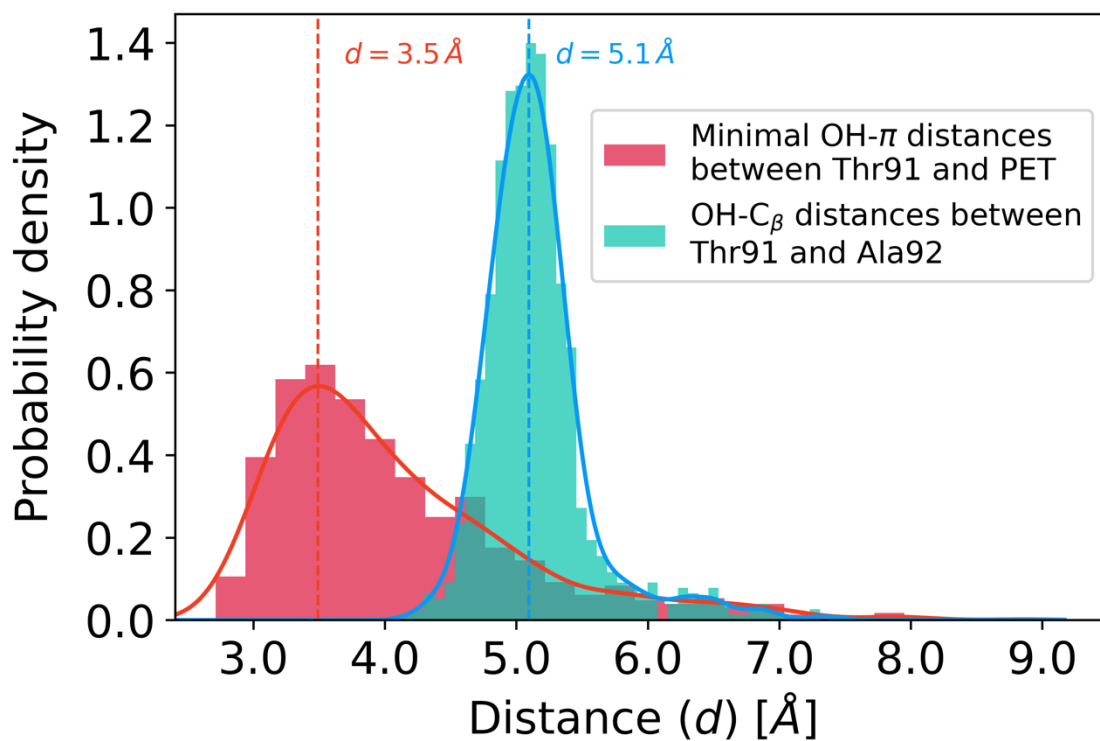

**Figure S3:** Probability density distributions related to the mutated residues Thr91 and Ala92 in PET6-VSTA. Red: the minimal distances between the H $\gamma$  of the hydroxyl group of Thr91 and the centroid of any  $\pi$  system of the PET tetramer. Blue: the distances between the H $\gamma$  of the hydroxyl group of Thr91 and the C $\beta$  of Ala92. The respective estimated probability density functions are represented with solid lines, the respective maxima of the distributions (maximum of the respective probability density function) are represented with dashed lines. The probability density function was calculated with the Scipy Python package (scipy.stats.norm object). The optimal number of bins was calculated with the Freedman-Diaconis rule.
